# Supplementary material
Source: publisher figshare collection journal article supplement (https://frontiersin.figshare.com/ndownloader/files/26032037)

**Supplementary Figure S1.** ML trees based on seven regions.

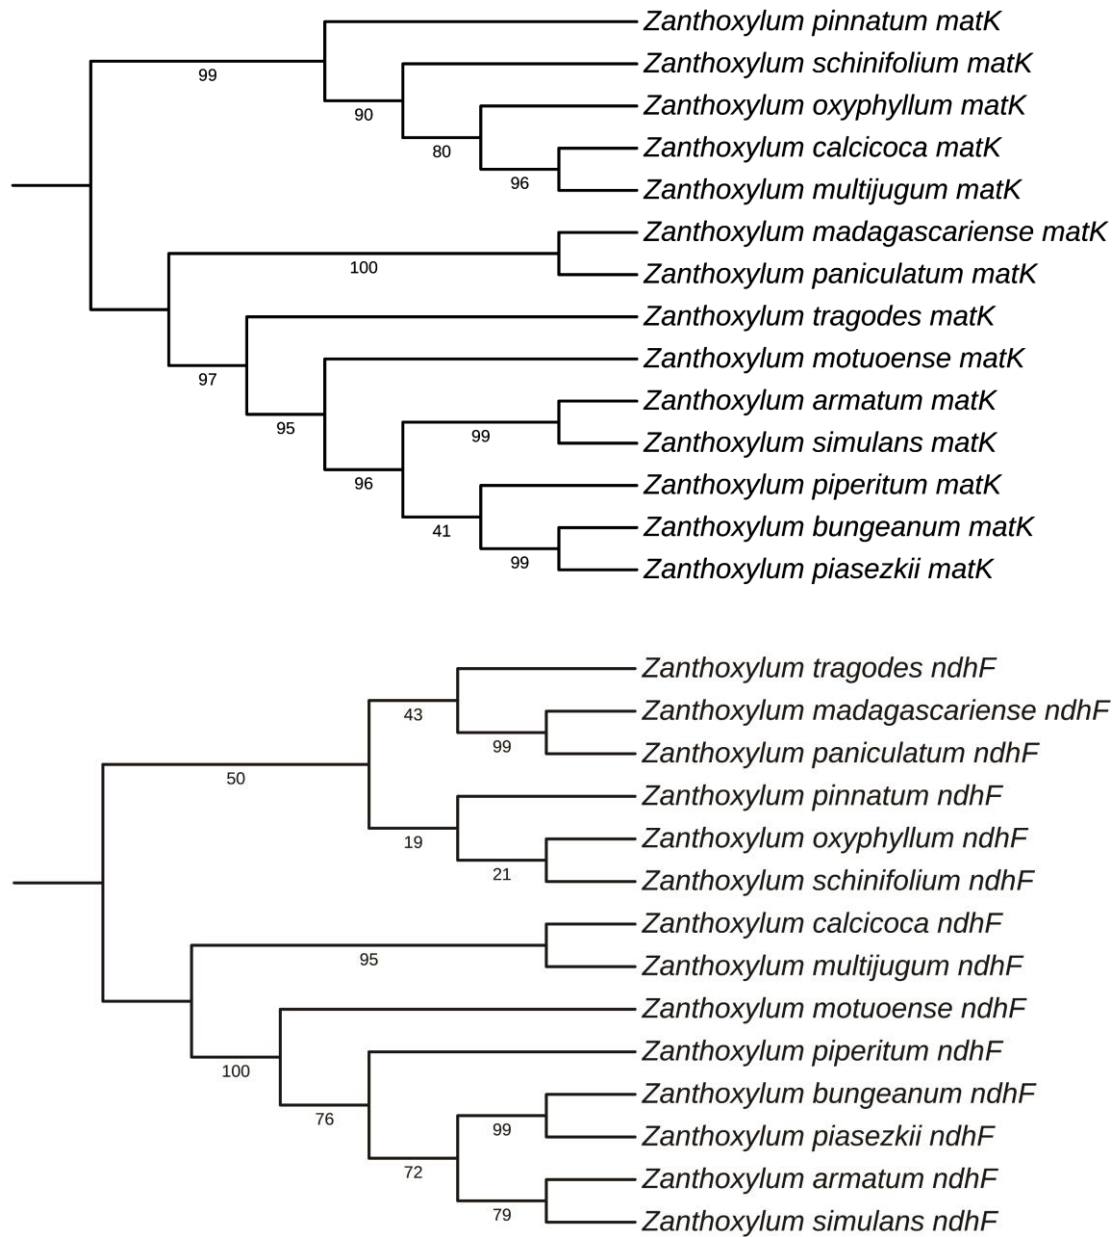

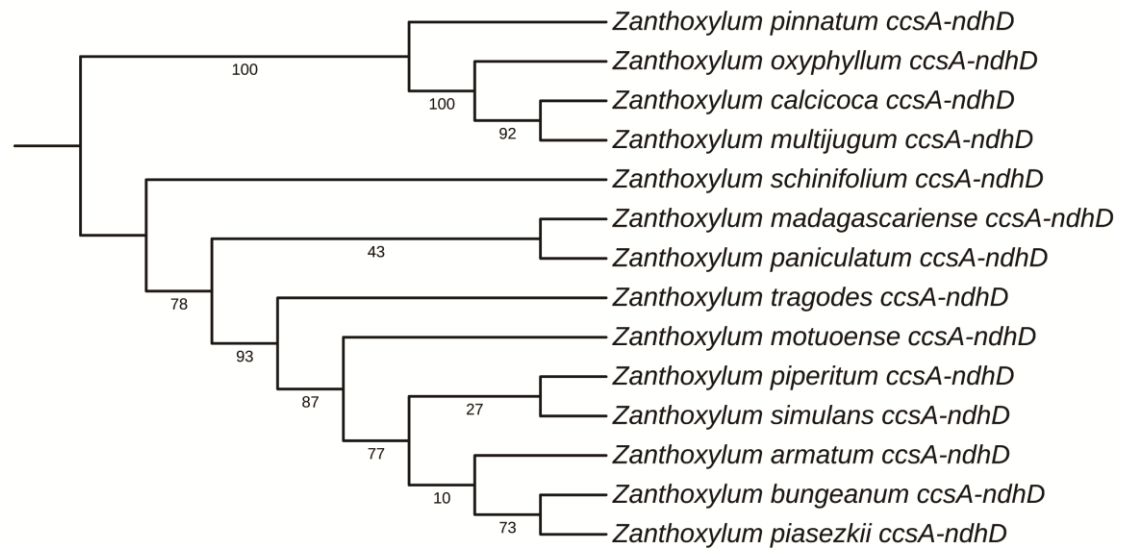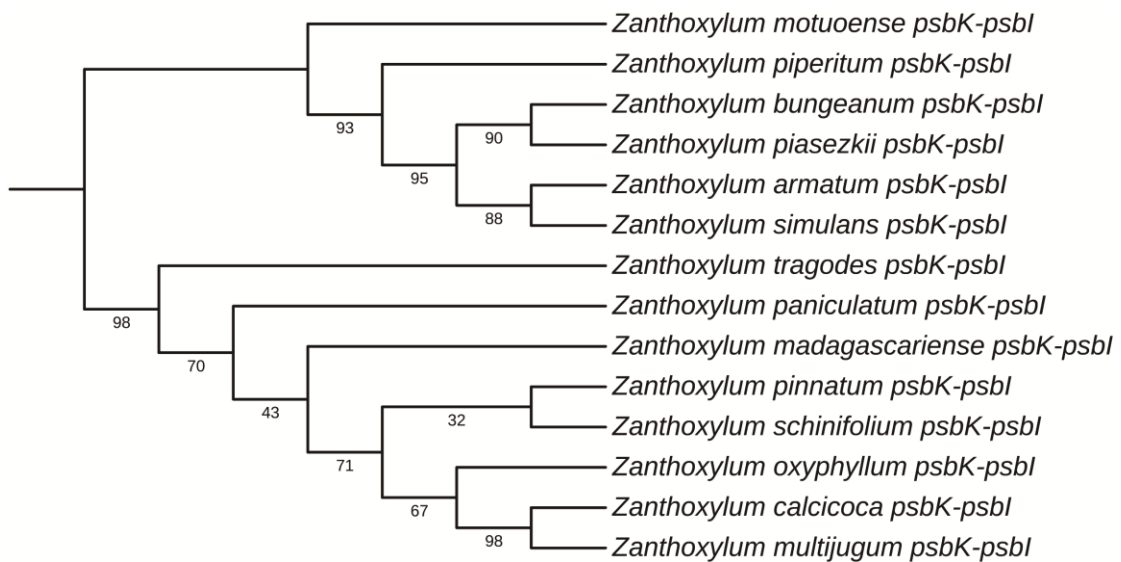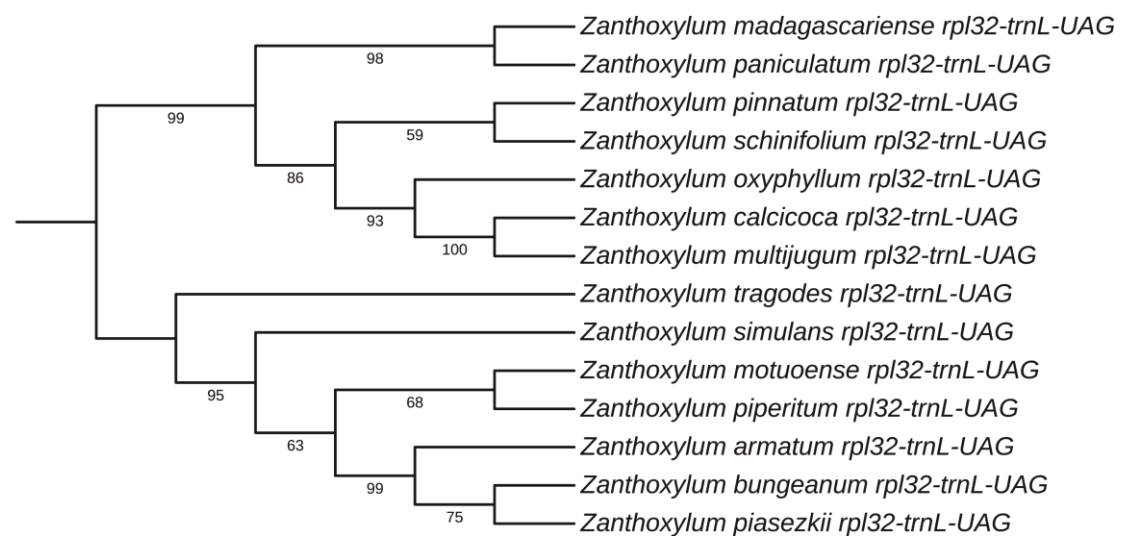

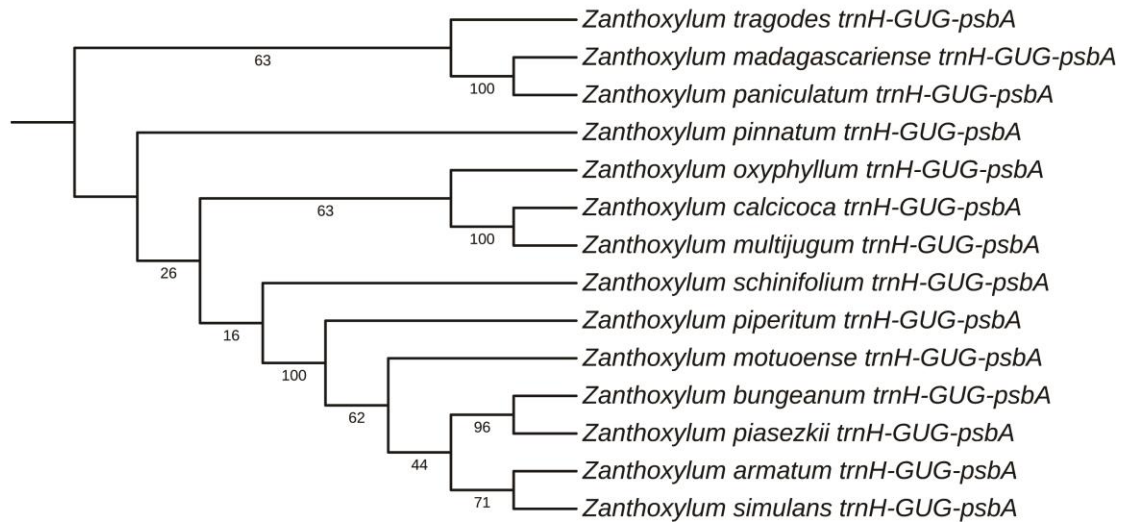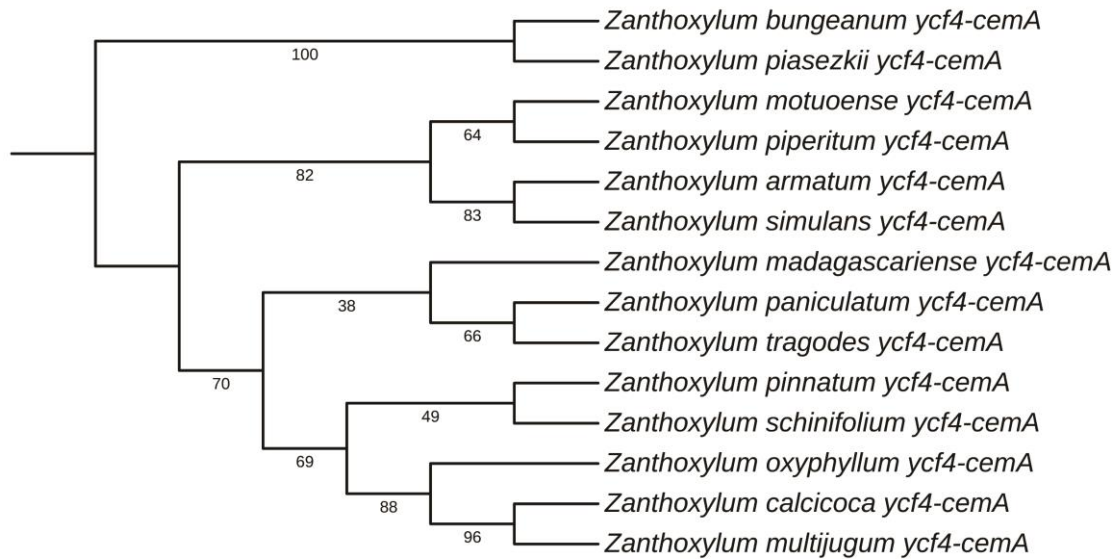

Supplement: Supplementary file [file 26032037]
